# Supplementary material for: Emerging investigator series: the effect of wildfire on streamwater mercury and organic carbon in a forested watershed in the southeastern United States
Source: Royal Society of Chemistry journal article supplement (doi:10.1039/c7em00419b), 2017-01-01
Supplement: c7em00419b1.pdf [file c7em00419b1.pdf]

## Supplemental

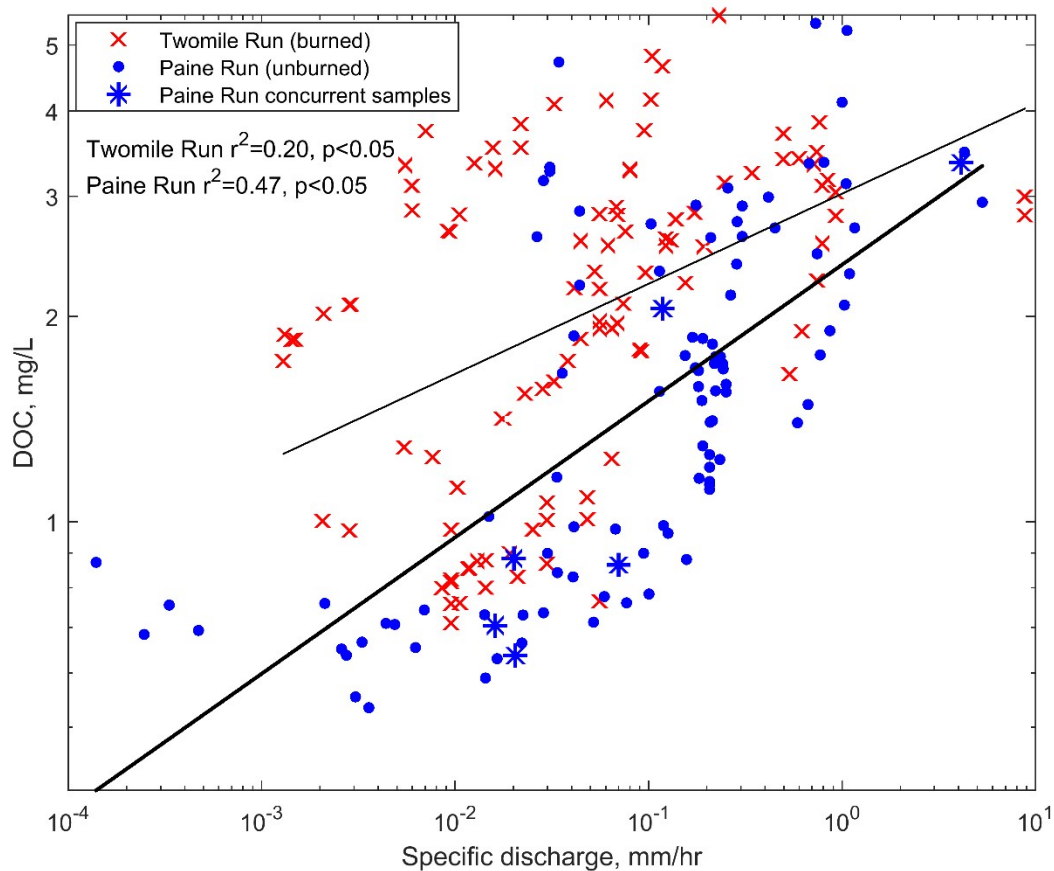

**Figure S1.** Dissolved Organic Carbon (DOC) versus specific discharge, and corresponding regression lines, at Twomile Run (thin line) and Paine Run (thick line). The two sites have similar ranges in discharge and DOC.

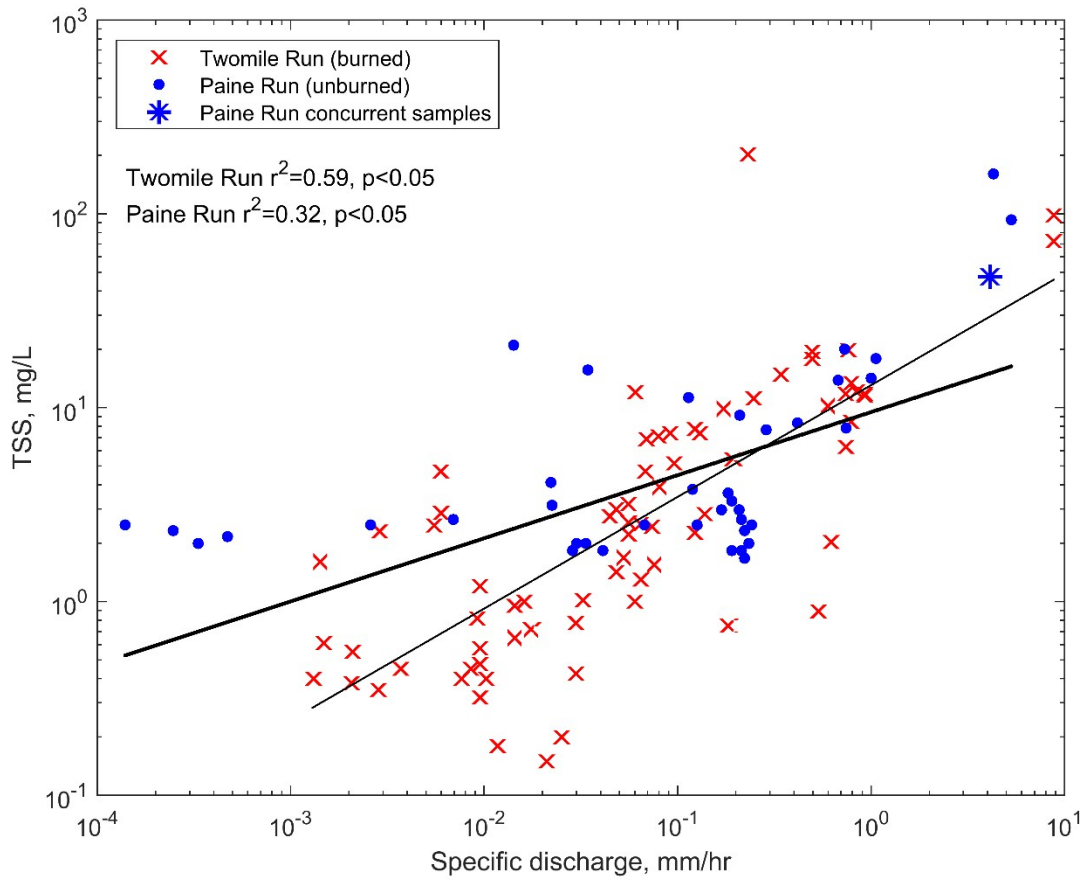

**Figure S2.** Total Suspended Sediment (TSS) versus specific discharge, and corresponding regression lines, at Twomile Run (thin line) and Paine Run (thick line). The two sites have similar ranges in discharge and TSS.
